# Supplementary material for: Carbene transposition involving double dehydrogenation of an sp3 carbon
Source: Royal Society of Chemistry journal article supplement (doi:10.1039/b102422c), 2001-01-01
Supplement: b102422c.doc [file b102422c.doc]

Supplementary Information for

**Carbene Transposition Involving Double Dehydrogenation of an sp3 Carbon**

# Joseph N. Coalter, III, John C. Huffman, and Kenneth G. Caulton*

**General Considerations.** All manipulations were performed using standard Schlenk techniques or in an argon filled glovebox unless otherwise noted. Solvents were distilled from Na, Na/benzophenone, P2O5, or CaH2, degassed prior to use, and stored over 4Å molecular sieves in air-tight vessels. Alumina (neutral, activity I, 60-325 mesh) was dried by heating (250 C) at 0.003 Torr (48 h). NaO(2,6‑Me2C6H3)·THF was prepared from the parent phenol using NaH in THF [the residual THF content was determined by 1H NMR]. 1H NMR chemical shifts are reported in ppm relative to protio impurities in the deutero solvents, and 31P spectra are referenced to external standards of 85% H3PO4 (0.0 ppm). NMR spectra were recorded with either a Varian Gemini 2000 (300 MHz 1H; 121 MHz 31P; 75 MHz 13C), or a Varian Unity INOVA instrument (400 MHz 1H; 162 MHz 31P; 101 MHz 13C). The following abbreviations are used: s = singlet, d = doublet, t = triplet, vt = virtual triplet, m = multiplet, ap = apparent.

**Ru[O(2,6‑Me2C6H3)]Cl(PCy3)(=CHPh).** Under argon, 15.0 mg (0.018 mmol) of RuCl2(PCy3)2(=CHPh) and 7.8 mg (0.036 mmol) of NaO(2,6‑Me2C6H3)·THF were combined in 0.5 mL THF-d8 and added to an NMR equipped with a Teflon seal. 1H and 31P{1H} NMR spectra taken of the red solution after 30 minutes show quantitative conversion to the title compound, equimolar free PCy3, and signals for the excess NaOAr. The use of *one* equivalent of NaOAr resulted in an identical spectra except for the lack of free NaOAr signals. 1H NMR (400 MHz, THF-d8, 20C):  1.28, 1.77 (br m, 30H, P(C6*H*11)3),  1.86 (s, 6H, *Me*2C6H3),  2.38 (m, 3H, P(C6*H*11)3),  6.35 (d, 3JH-H = 7 Hz, 2H, *o*-C6*H*5),  6.47 (t, 3JH-H = 7 Hz, 1H, *p*‑Me2C6*H*3),  6.58 (d, 3JH-H = 7 Hz, 2H, *m*‑Me2C6*H*3),  6.80 (ap t, 3JH-H = 7 Hz, 2H, *m*‑C6*H*5),  7.08 (t, 3JH-H = 7 Hz, 1H, *p*-C6*H*5),  16.80 (d, 3JP-H = 6 Hz, 1H, Ru=C*H*Ph). 31P{1H} NMR (162 MHz, THF-d8, 20C):  79.1 (s).

**Ru[2‑CH(MeC6H3)O]Cl(PCy3)2.** Under argon, 500 mg (0.60 mmol) of RuCl2(PCy3)2(=CHPh) and 260 mg (1.20 mmol) of NaO(2,6‑Me2C6H3)·THF were combined in 30 mL THF. The mixture was stirred at room temperature for 12 hours before heating to 60 C for 8 hours. The volatiles were removed from the deep green solution and the residue was extracted with 40 mL of toluene and filtered. After removal of the volatiles again *in vacuo*, the residue was eluted (under Ar) through a 5 cm column of alumina with pentane/EtOAc (50:1). Collecting the green fraction, and reducing to dryness yielded 225 mg of a deep green solid. When this reaction is monitored *in situ* in THF‑in an NMR tube, toluene was observed concurrent with formation of the title compound. The *in situ* yield of title compound by 31P NMR is approximately 75‑80%. Performing this reaction using only *one* equivalent of NaOAr produced the same product on an NMR tube scale. 1H NMR (300 MHz, CD2Cl2, 20 C):  1.01, 1.28, 1.42, 1.70, 1.99 (m, 66H, P(C6*H*11)3),  2.32 (s, 3H, *Me*C6H3),  6.34 (ap t, 3JH‑H = 7 Hz, 1H, C6*H*3),  6.95 (d, 3JH-H = 7 Hz, 1H, C6*H*3),  7.05 (d, 3JH-H = 8 Hz, 1H, C6*H*3), 16.43 (s, 1H, Ru=C*H*). 31P{1H} NMR (121 MHz, CD2Cl2, 20C):  35.6 (s). 13C{1H} NMR (75 MHz, CD2Cl2, 20C):  16.1 (s, *Me*C6H3),  26.9 (s, P(4-*C*6H11)3),  27.9 (vt, 3JC‑H = 6 Hz, P(3,5-*C*6H11)3),  28.1 (s, P(2,6-*C*6H11)3),  28.2 (s, P(2,6‑*C*6H11)3),  28.4 (vt, 3JC‑H = 6 Hz, P(3,5-*C*6H11)3),  32.4 (vt, 3JC‑H = 9 Hz, P(1‑*C*6H11)3),  112.6, 120.1, 125.8, 130.6, 148.2, 180.3 (s, *C*6H3),  277.7 (br. s, Ru=*C*H).

**X-Ray structure of Ru[n2‑CH(MeC6H3)O]Cl(PCy3)2.** The sample was crystallized by slow removed of the volatiles of a saturated hexane solution *in vacuo*. A typical crystal 0.25 x 0.14 x 0.06 mm was chosen for the study. The selected crystal was affixed to the side of a glass fiber using silicone grease and cooled to 112 K for data collection. The data were collected using 30-second frames with an omega scan of 0.30 degrees. Examination of the data using RLATT indicated that a small fragment was still present. In spite of the fragment, it was possible to index the reflections as a triclinic cell with little difficulty. Data were integrated and corrected in the usual manner. Several peaks were located near a center of inversion and were refined with 50% occupancy. The distances and angles for the latter are consistent with a simple disordered alkane solvent molecule. It was not possible to determine the exact composition of the solvent, but it is consistent with C6H12, and this formulation was assumed in the calculations. Hydrogen atoms were placed in fixed idealized positions for the final cycles of refinement. A final difference Fourier was essentially featureless, but contained numerous peaks of intensity exceeding 1.0 e/A3.

Table 1 – Crystallographic Data for Ru[n2‑CH(MeC6H3)O]Cl(PCy3)2.

| Formula | C47H80ClOP2Ru | Formula Weight | 859.62 |
| --- | --- | --- | --- |
| Crystal System | Triclinic | Space Group | P1(bar) |
| *a*, Å | 12.5352(16) | *T*, C | -161 |
| *b*, Å | 13.7485(18) | , Å | 0.71073 |
| *c*, Å | 14.4562(20) | calcd, g/cm-3 | 1.282 |
| ,  | 73.591(4) |  (Mo K), cm-1 | 5.172 |
| ,  | 69.803(4) | *Ra* | 0.0503 |
| ,  | 78.316(4) | *R*w*b* | 0.0440 |
| *V*, Å3 | 2227.6(8) | *Z* | 2 |

*a* R = ║*F*o-*F*c║/*F*o. *b* R = [*w*(*F*o-*F*c)2/ *w**F*o2]1/2 where *w* = 1/2(*F*o).

Table 2 – Selected Bond Lengths (Å) and Angles () for Ru[n2‑CH(MeC6H3)O]Cl(PCy3)2.

| Ru(1)-P(12) | 2.3947(19) | Ru(1)-C(10) | 1.872(7) |
| --- | --- | --- | --- |
| Ru(1)-P(31) | 2.4005(19) | O(3)-C(4) | 1.327(7) |
| Ru(1)-O(3) | 2.082(4) | C(4)-C(9) | 1.410(9) |
| Ru(1)‑Cl(2) | 2.3910(17) | C(9)-C(10) | 1.427(9) |
|  |  |  |  |
| P(12)-Ru(1)-P(31) | 167.17(6) | P(31)-Ru(1)-C(10) | 95.23(20) |
| Cl(2)-Ru(1)-O(3) | 171.17(13) | P(12)-Ru(1)-C(10) | 97.37(20) |
| O(3)-Ru(1)-C(10) | 81.05(24) | Ru(1)-O(3)-C(4) | 111.7(4) |
| Cl(2)-Ru(1)-C(10) | 107.66(22) | Ru(1)-C(10)-C(9) | 117.2(5) |
